# Supplementary material for: Over-activation of a nonessential bacterial protease DegP as an antibiotic strategy
Source: PubMed Central journal article supplement (PMC7529758; doi:10.1038/s42003-020-01266-9), 2020-10-01
Supplement: 42003_2020_1266_MOESM2_ESM.pdf [file 42003_2020_1266_MOESM2_ESM.pdf]

## **Description of Additional Supplementary Files**

File Name: Supplementary Data 1

Description: Source data underlying plots shown in figures.
